# Supplementary material
Source: PubMed Central journal article supplement (PMC7392062)
Supplement: NIHMS1612492-supplement-1.pdf [file NIHMS1612492-supplement-1.pdf]

**Cell Reports, Volume 32**

**Supplemental Information**

**The Cdc48 Complex Alleviates  
the Cytotoxicity of Misfolded Proteins  
by Regulating Ubiquitin Homeostasis**

**Ryan Higgins, Marie-Helene Kabbaj, Delaney Sherwin, Lauren A. Howell, Alexa Hatcher, Robert J. Tomko Jr., and Yanchang Wang**

## SUPPLEMENTAL INFORMATION

**Figure S1** (related to Figure 1). The proline-rich region in Huntingtin affects its aggregation and degradation. **A.** Cellular localization of Htt103QP-GFP and Htt103QΔP-GFP in yeast cells. Yeast cells with *P<sub>GAL</sub>FLAG-Htt103QP-GFP* (3419-1-1) and *P<sub>GAL</sub>FLAG-Htt103QΔP-GFP* (YYW313-1) were grown in raffinose medium to mid-log phase at 30°C. Galactose (final concentration 2%) was added and cell images were taken after a 6-hour incubation in galactose medium. The GFP signal is shown. Scale bar, 5μm. **B.** The degradation kinetics of Htt103QP and Htt103QΔP. The above yeast strains were grown in raffinose medium to mid-log phase. Galactose (final concentration 2%) was added for 1 hour to induce Htt103QP and Htt103QΔP expression, followed by addition of glucose to shut off the induction. Protein samples were prepared over time; Htt103QP and Htt103QΔP protein levels were monitored over time with anti-FLAG antibody. Pgk1 was used as a loading control. The experiment was repeated three times and the relative abundance of Huntingtin over Pgk1 is shown in **C** as mean ± SD. The Wilcoxon rank sum test was used to calculate *p*-values, and the difference was considered significant (\*) when *p* < 0.05.

**Figure S2** (related to Figure 3). Increased Hsp104-positive aggregates in *cdc48-3*, *npl4-1*, and *ufd1-2* mutants. **A.** WT (YYW315-2) and *cdc48-3* (3506-1-1) mutants containing *HSP104-GFP* were grown in YPD (glucose medium) to mid-log phase at 25°C. Cells were then shifted to 34°C for 3 hours. Hsp104-GFP foci in WT and mutant cells were imaged (left) and quantified (right). The result is the average from three independent experiments (mean ± SD). Two-way ANOVA analysis with Tukey's multiple comparison test was performed (N = 3). \*, *p* < 0.05; \*\*, *p* < 0.01. Scale bar = 5μm. **B.** The Hsp104-GFP signal in WT (YYW316-1), *npl4-1* (3641-2-2), and *ufd1-2* (3642-1-1) mutants was compared using the same protocol as in (A).

**Figure S3** (related to Figure 4). The accumulation of Htt103QP on the proteasome increases in *cdc48-3* mutants. WT (3589-1-4), *RPN11-3*×*FLAG P<sub>GAL</sub>-Htt103QP-GFP* (3592-3-3), and *cdc48-3 RPN11-3*×*FLAG P<sub>GAL</sub>-Htt103QP-GFP* (3592-3-1) cells (80 mL) in *pdr5*Δ background were grown in YPR (raffinose medium) to mid-log phase at 25°C. Cells were shifted to 34°C and galactose was added for 3 hours. The proteasome inhibitor, MG132, was then added for 1 hour. Cells were harvested and lysed, and Rpn11-3×FLAG protein was immunoprecipitated using M2 anti-Flag beads. Htt103QP-GFP was detected using anti-GFP antibody. A 4% SDS-PAGE was

used to visualize Htt103QP-GFP species associated with proteasome protein Rpn11. In the strains used in this experiment, the Htt103QP construct lacked the FLAG tag that is present in most other experiments.

**Figure S4** (related to Figure 4). Deletion of *SAN1* and *UBR1* deletion partially suppresses the accumulation of ubiquitinated proteins on proteasomes. Strains with the indicated genotypes (in *pdv5Δ* background) were grown in YPD (glucose medium) to mid-log phase and then shifted to 34°C for 3 hours. MG-132 (50 μM) was then added for 1 hour. The cells were lysed and Rpn11-3×FLAG protein was immunoprecipitated using M2 anti-FLAG beads and ubiquitinated proteins were detected using anti-Ub antibody. We used 4% SDS-PAGE to visualize ubiquitinated high-molecular-weight protein species. A *pdv5Δ* strain (3589-1-4) was used as a negative control. *cdc48-3* (3592-3-1), *san1Δ ubr1Δ* (3625-1-2), and two *cdc48-3 san1Δ ubr1Δ* strains (3622-1-3 and 3624-1-1) were used to examine the level of high-molecular-weight species that are associated with proteasome protein Rpn11. These strains contain *RPN11-3×FLAG* and *P<sub>GAL</sub>Htt103QP-GFP* that lacks the N-terminal FLAG tag. In this experiment, yeast cells were grown in glucose medium and no Htt103QP expression is induced.

**Figure S5** (related to Figure 4). The increased accumulation of ubiquitinated proteins on proteasomes in *cdc48-3* mutant cells depends on Dsk2 and Rad23. Yeast strains WT (3589-1-4), *RPN11-3×FLAG* (3592-4-4), *cdc48-3 RPN11-3×FLAG* (3592-5-2), and *cdc48-3 rad23Δ dsk2Δ RPN11-3×FLAG* (3967-2-4) in *pdv5Δ* background were grown in YPD (glucose medium) to mid-log phase and then shifted to 34°C for 3 hours. Proteasome inhibitor MG-132 was then added at 50 μM for 1 hour. The cell lysates were immunoprecipitated using M2 anti-FLAG beads for Rpn11-3×FLAG protein, and ubiquitinated protein species were detected using anti-Ub antibody. We used 4% SDS-PAGE to visualize ubiquitinated high-molecular-weight protein species. The protein levels of Rpn11-3×FLAG and Pgk1 are shown.

**Figure S6** (related to Figure 5). **A.** Western blotting results show HA-Ub induction after switch from raffinose (Raff) to galactose (Gal) using anti-HA antibody. \* indicates the HA-fusion peptide generated from the control vector. **B.** High-level ubiquitin expression in *cdc48-3* mutants. A empty vector (pRS416) or a *P<sub>ADHI</sub>RPS31(UBI3)* ubiquitin plasmid was introduced into WT (Y300) and *cdc48-3* (MHY3512) cells, and the transformants were selected on URA dropout plates. Saturated

cultures of the transformants were serially 10-folded diluted and spotted onto URA dropout plates. Images were acquired after incubation at 25°C, 30°C, 34°C and 37°C for 3 days.

Figure S1. Higgins et al.

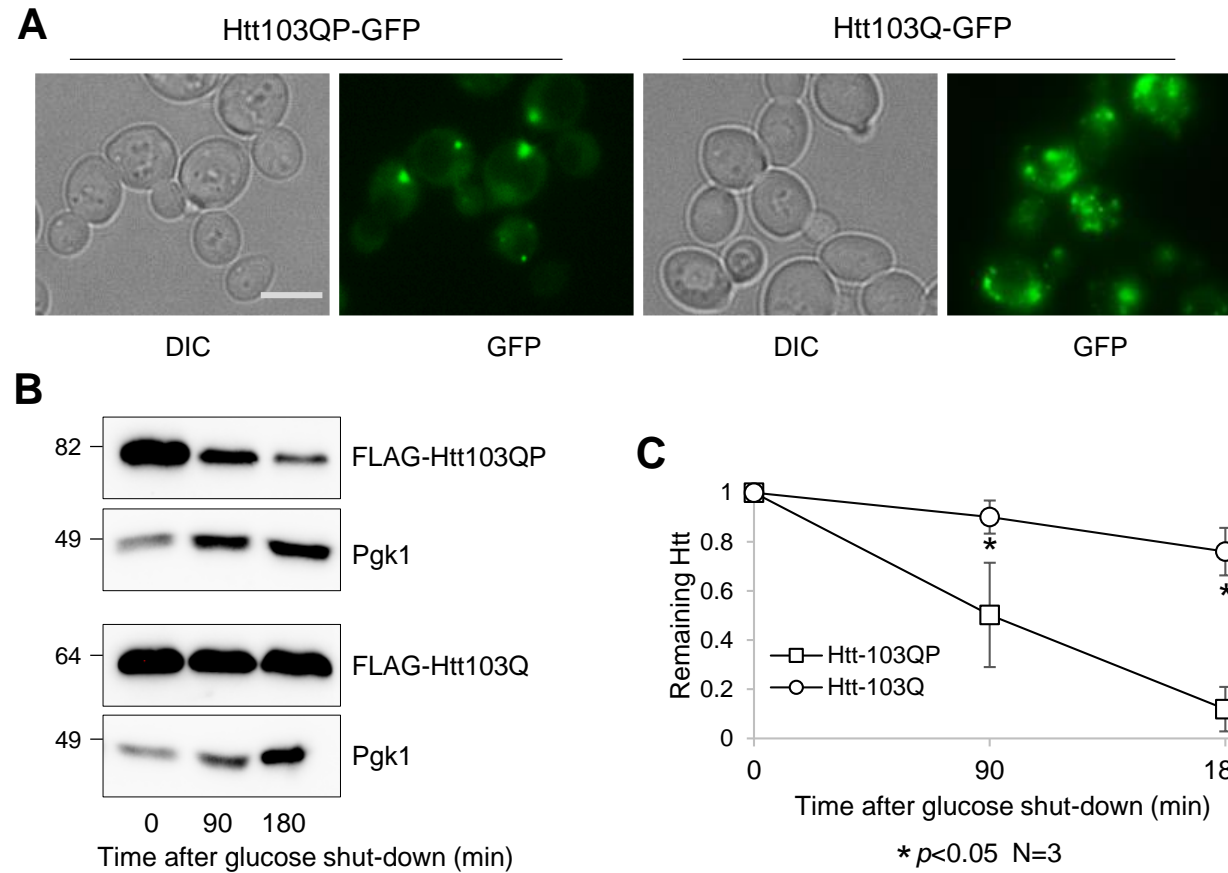

Fig. S2 Higgins et al.

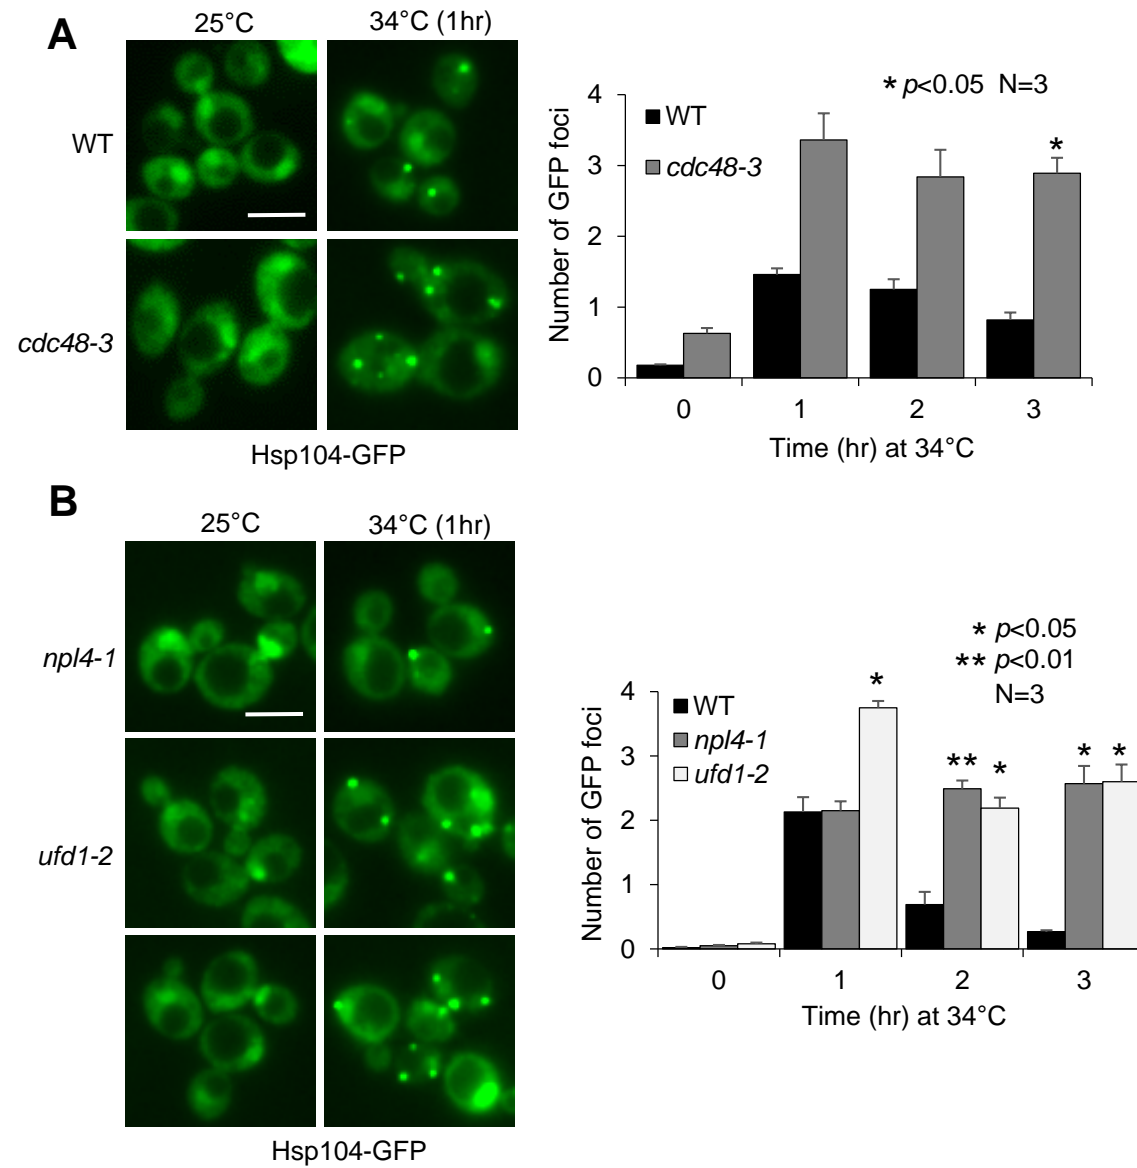

**Figure S3. Higgins et al.**

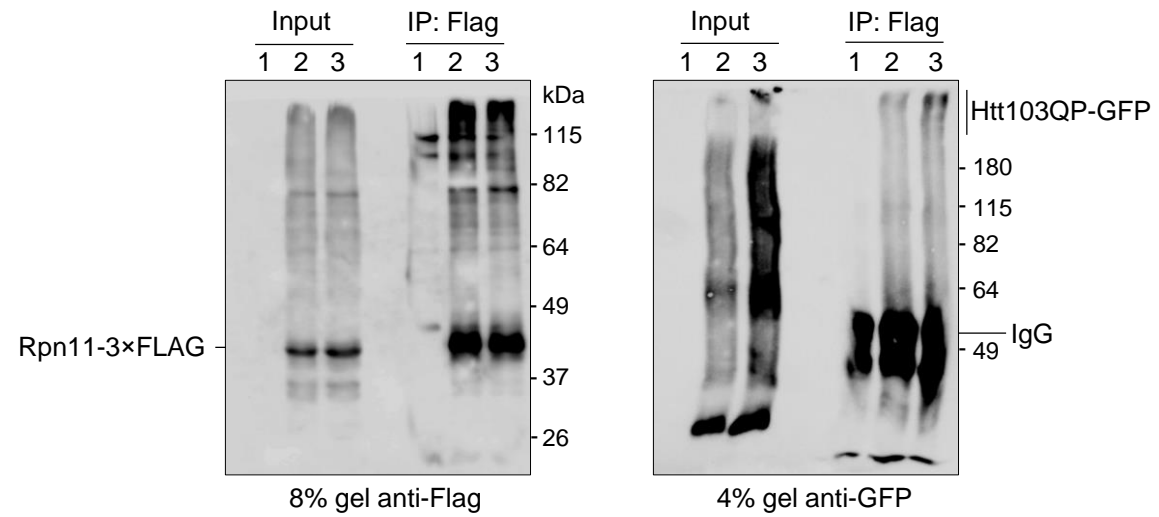

1. WT
2. *Rpn11-3xFlag Htt103QP-GFP*
3. *cdc48-3 Rpn11-3xFlag Htt103QP-GFP*

**Figure S4. Higgins et al.**

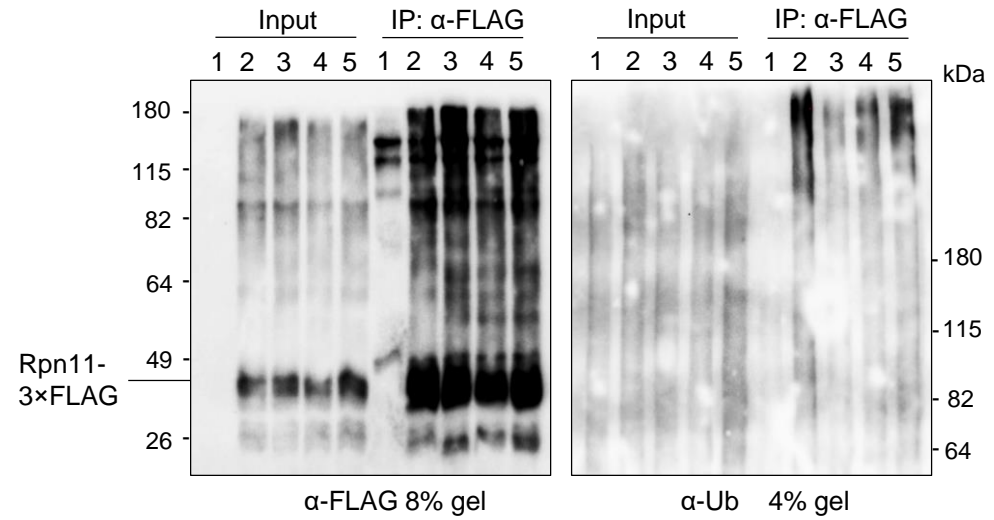

**1.** WT; **2.** *cdc48-3 RPN11-3xFLAG*; **3.** *san1 $\Delta$  ubr1 $\Delta$  RPN11-3xFLAG*; **4.** *san1 $\Delta$  ubr1 $\Delta$  cdc48-3 RPN11-3xFLAG*; **5.** *san1 $\Delta$  ubr1 $\Delta$  cdc48-3 RPN11-3xFLAG*



**Figure S5. Higgins et al.**

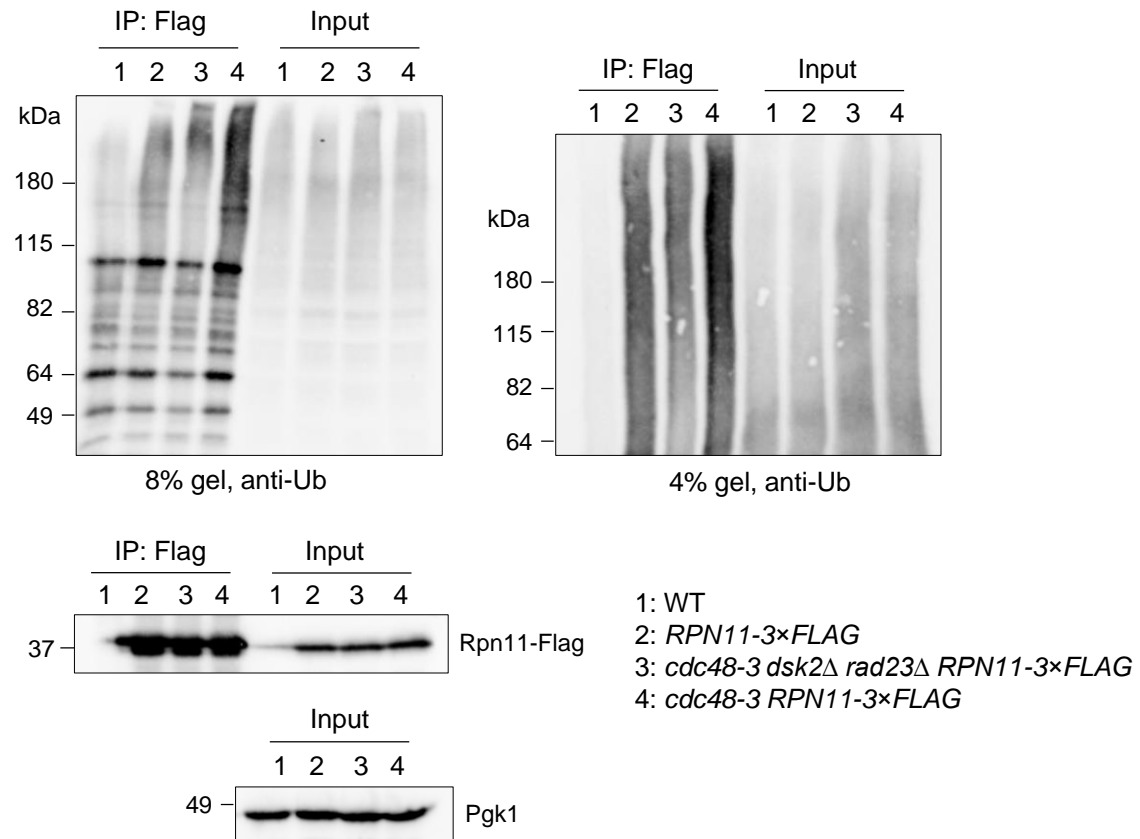

Figure S6. Higgins et al.

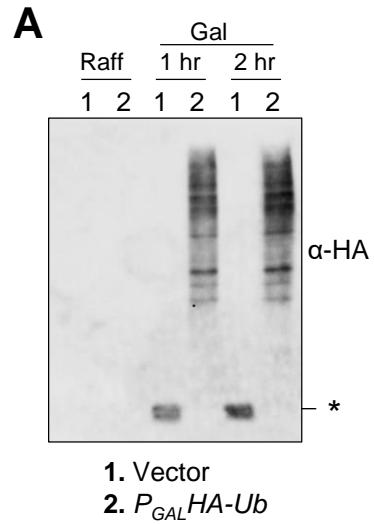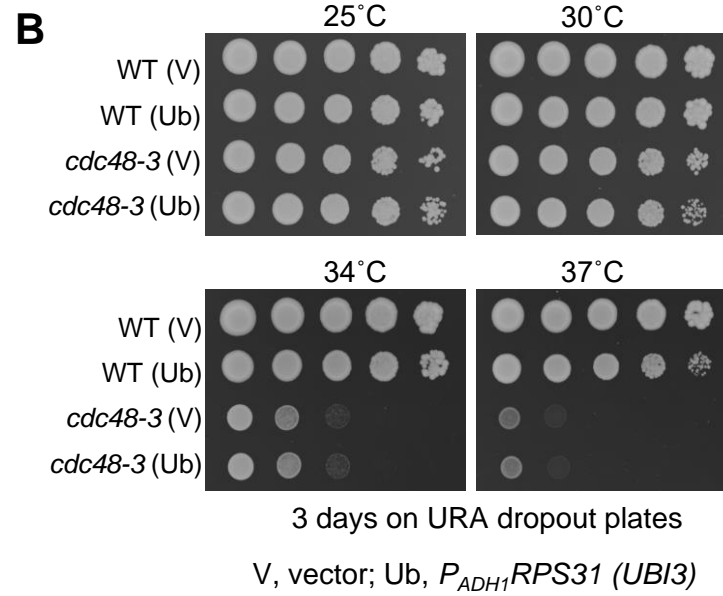

**Table S1. Yeast deletion mutants used to screen the E3 ligase for Htt103QP (related to Figure 2A)**

| ORF     | NAME         | Motif                                |
|---------|--------------|--------------------------------------|
| YAL002W | VPS8         | RING finger                          |
| YBR062C | YBR062C      | RING finger                          |
| YBR114W | RAD16        | RING finger                          |
| YBR158W | AMN1         | F-box                                |
| YBR203W | COS111       | F-box                                |
| YBR280C | SAF1         | F-box                                |
| YCR066W | RAD18        | RING finger                          |
| YDL013W | SLX5         | RING finger                          |
| YDL190C | UFD2         | U-box                                |
| YDR049W | VMS1         | Zinc finger, C2H2                    |
| YDR103W | STE5         | RING finger                          |
| YDR131C | YDR131C      | F-box                                |
| YDR132C | MRX16        | BTB                                  |
| YDR143C | SAN1         | RNF-ring finger                      |
| YDR219C | MFB1         | F BOX                                |
| YDR255C | RMD5         | RING finger                          |
| YDR265W | PEX10        | RING finger                          |
| YDR266C | HEL2         | RING finger                          |
| YDR306C | PFU1         | F-box                                |
| YDR313C | PIB1         | RING finger                          |
| YDR457W | TOM1         | HECT                                 |
| YER116C | SLX8         | RING finger                          |
| YGL003C | CDH1         | WD40 repeat, APC/C complex component |
| YGL131C | SNT2         | RING finger                          |
| YGL141W | HUL5         | HECT                                 |
| YGR003W | CUL3         | CULLIN REPEAT                        |
| YGR184C | UBR1         | RING finger                          |
| YHL010C | ETP1         | RING finger                          |
| YHR115C | DMA1         | RING finger                          |
| YIL001W | YIL001W      | BTB                                  |
| YIL030C | SSM4 (DOA10) | RING finger                          |
| YJL047C | RTT101       | CULLIN                               |
| YJL149W | DAS1         | F BOX                                |
| YJL157C | FAR1         | RING finger                          |
| YJL204C | RCY1         | F BOX                                |
| YJL210W | PEX2         | RING finger                          |
| YJR036C | HUL4         | HECT                                 |
| YJR052W | RAD7         | F-box                                |
| YJR090C | GRR1         | F-box                                |
| YKL010C | UFD4         | HECT                                 |
| YKL034W | TUL1         | RING finger                          |
| YKR017C | HEL1         | RING finger                          |
| YLR024C | UBR2         | RING finger                          |
| YLR032W | RAD5         | RING finger                          |

|         |         |                                      |
|---------|---------|--------------------------------------|
| YLR097C | HRT3    | F-box                                |
| YLR108C | YLR108C | BTB                                  |
| YLR224W | UCC1    | F-box                                |
| YLR247C | IRC20   | RING finger                          |
| YLR352W | LUG1    | F-box                                |
| YLR368W | MDM30   | F-box                                |
| YLR427W | MAG2    | RING finger                          |
| YML068W | ITT1    | RING finger                          |
| YML088W | UFO1    | F-box                                |
| YMR026C | PEX12   | RING finger                          |
| YMR119W | ASI1    | RING finger                          |
| YMR247C | RKR1    | RING Zinc finger                     |
| YMR258C | ROY1    | F-box                                |
| YNL008C | ASI3    | RING finger                          |
| YNL023C | FAP1    | RING finger                          |
| YNL116W | DMA2    | RING finger                          |
| YNL230C | ELA1    | F-box                                |
| YNL311C | SKP2    | F-box                                |
| YOL013C | HRD1    | RING finger                          |
| YOL054W | PSH1    | RING finger                          |
| YOL138C | RTC1    | RING finger                          |
| YOR080W | DIA2    | F-box                                |
| YOR191W | ULS1    | RING finger                          |
| YPL046C | ELC1    | ELONGIN C,BTB,SKP1 COMPPNENT         |
| YPR093C | ASR1    | RING finger                          |
| YMR247C | RKR1    | RING finger                          |
| YMR080C | NAM7    | CH-rich domain (RING-related domain) |

**Table S2. Yeast strains used in this study (related to Star Methods)**

| <b>Strains</b> | <b>Genotype</b>                                                                        | <b>Reference</b> |
|----------------|----------------------------------------------------------------------------------------|------------------|
| Y300 (WT)      | Mata <i>ura3-1, his3-11,15 leu2-3,112 trp1-1, ade2-1, can1-100</i>                     | Lab Stock        |
| MHY3512        | Mata <i>cdc48-3 ura3-52 leu2-3, 122 ade2-1 trp1-1 his3</i>                             | Hochstasser      |
| 1126           | Mata <i>npl4-1</i>                                                                     | R.H. Chen        |
| 1122           | Mata <i>ufd1-2</i>                                                                     | R.H. Chen        |
| 3419-1-1       | Mata <i>P<sub>GAL</sub>FLAG-Htt103QP-GFP::URA3</i>                                     | This study       |
| 3598-2-3       | Mata <i>cdc48-3 P<sub>GAL</sub>FLAG-Htt103QP-GFP::URA3</i>                             | This study       |
| 3387-3-4       | Mata <i>npl4-1 P<sub>GAL</sub>FLAG-Htt103QP-GFP::URA3</i>                              | This study       |
| 3385-4-4       | Mata <i>ufd1-2 P<sub>GAL</sub>FLAG-Htt103QP-GFP::URA3</i>                              | This study       |
| RH142          | Mata <i>san1::Sphis5<sup>+</sup> P<sub>GAL</sub>FLAG-Htt103QP-GFP::URA3</i>            | This study       |
| 3301-2-2       | Mata <i>san1::KanMX P<sub>GAL</sub>FLAG-Htt103QP-GFP::URA3</i>                         | This study       |
| 3522-4-4       | Mata <i>ubr1::KanMX P<sub>GAL</sub>FLAG-Htt103QP-GFP::URA3</i>                         | This study       |
| 3287-1-1       | Mata <i>ltn1::KanMX P<sub>GAL</sub>FLAG-Htt103QP-GFP::URA3</i>                         | This study       |
| 3288-1-3       | Mata <i>ufd2::KanMX P<sub>GAL</sub>FLAG-Htt103QP-GFP::URA3</i>                         | This study       |
| 2925-3-2       | Mata <i>HTA1-mApple-HIS3 P<sub>GAL</sub>FLAG-Htt103QP-GFP::URA3</i>                    | This study       |
| 3222-1-1       | Mata <i>dsk2::TRP1 P<sub>GAL</sub>FLAG-Htt103QP-GFP::URA3</i>                          | This study       |
| 3514-1-2       | Mata <i>dsk2::TRP1 san1::KanMX P<sub>GAL</sub>FLAG-Htt103QP-GFP::URA3</i>              | This study       |
| FY-13-1        | Mata Y300 ( <i>P<sub>GAL</sub>HA-CLB5::URA3</i> )                                      | This study       |
| 3504-3-2       | Mata <i>cdc48-3 (P<sub>GAL</sub>HA-CLB5::URA3)</i>                                     | This study       |
| 3580-1-3       | Mata <i>cdc48-3 san1::TRP1 ubr1::Sphis5<sup>+</sup> (P<sub>GAL</sub>HA-CLB5::URA3)</i> | This study       |
| 3660-1-4       | Mata <i>cdc48-3 ubr2::KanMX (P<sub>GAL</sub>HA-CLB5::URA3)</i>                         | This study       |
| 229-3-2        | Mata <i>CLB5-HA</i>                                                                    | Lab stock        |
| 3968-4-3       | Mata <i>cdc48-3 san1::TRP1 ubr1::Sphis5<sup>+</sup> CLB5-HA</i>                        | This study       |
| 3968-5-1       | Mata <i>cdc48-3 CLB5-HA</i>                                                            | This study       |
| 3969-4-4       | Mata <i>ubr2::KanMX</i>                                                                | This study       |
| 3655-2-4       | Mata <i>cdc48-3 ubr2::KanMX</i>                                                        | This study       |
| 3658-1-4       | Mata <i>npl4-1 ubr2::KanMX</i>                                                         | This study       |
| 3659-1-2       | Mata <i>ufd1-2 ubr2::KanMX</i>                                                         | This study       |
| 3550-5-3       | Mata <i>cdc48-3 san1::TRP1</i>                                                         | This study       |
| 3550-6-3       | Mata <i>cdc48-3 ubr1::Sphis5<sup>+</sup></i>                                           | This study       |
| 3550-2-1       | Mata <i>cdc48-3 san1::TRP1 ubr1::Sphis5<sup>+</sup></i>                                | This study       |
| 3555-5-1       | Mata <i>npl4-1 san1:TRP1 ubr1::Sphis5<sup>+</sup></i>                                  | This study       |
| 3556-3-3       | Mata <i>ufd1-2 san1:TRP1 ubr1::Sphis5<sup>+</sup></i>                                  | This study       |
| 3556-1-1       | Mata <i>ufd1-2 san1::TRP1</i>                                                          | This study       |
| 3556-2-3       | Mata <i>ufd1-2 ubr1::Sphis5<sup>+</sup></i>                                            | This study       |
| YYW14          | Mata <i>dsk2::TRP1</i>                                                                 | This study       |
| 3553-2-4       | Mata <i>rad23::Sphis5<sup>+</sup></i>                                                  | This study       |
| 3553-5-3       | Mata <i>dsk2:TRP1 rad23::Sphis5<sup>+</sup></i>                                        | This study       |
| 3553-10-3      | Mata <i>cdc48-3 rad23::Sphis5<sup>+</sup></i>                                          | This study       |
| 3553-7-2       | Mata <i>cdc48-3 dsk2::TRP1</i>                                                         | This study       |
| 3553-3-2       | Mata <i>cdc48-3 rad23::Sphis5<sup>+</sup> dsk2::TRP1</i>                               | This study       |
| RH156          | Mata Y300 ( <i>p1217, empty vector TRP1</i> )                                          | This study       |
| RH157          | Mata Y300 ( <i>P<sub>GAL</sub>HA-Ub-TRP1</i> )                                         | This study       |
| RH158          | Mata <i>cdc48-3 (p1217, empty vector TRP1)</i>                                         | This study       |
| RH159          | Mata <i>cdc48-3 (P<sub>GAL</sub>HA-Ub-TRP1)</i>                                        | This study       |
| RH160          | Mata <i>npl4-1 (p1217, empty vector TRP1)</i>                                          | This study       |
| RH161          | Mata <i>npl4-1 (P<sub>GAL</sub>HA-Ub-TRP1)</i>                                         | This study       |
| RH162          | Mata <i>ufd1-2 (p1217, empty vector TRP1)</i>                                          | This study       |
| RH163          | Mata <i>ufd1-2 (P<sub>GAL</sub>HA-Ub-TRP1)</i>                                         | This study       |
| 3589-1-4       | Mata <i>pdr5::KanMX</i>                                                                | This study       |
| 3592-4-4       | Mata <i>pdr5::KanMX RPN11-3×FLAG::HIS3</i>                                             | This study       |
| 3592-5-2       | Mata <i>pdr5::KanMX cdc48-3 RPN11-3×FLAG::HIS3</i>                                     | This study       |

|          |                                                                                                                          |             |
|----------|--------------------------------------------------------------------------------------------------------------------------|-------------|
| 3592-3-1 | Mata <i>pdr5::KanMX cdc48-3 RPN11-3×FLAG::HIS3 P<sub>GAL</sub>Htt103QP-GFP::URA3</i>                                     | This study  |
| 3592-3-3 | Mata <i>pdr5::KanMX RPN11-3×FLAG::HIS3 P<sub>GAL</sub>Htt103QP-GFP::URA3</i>                                             | This study  |
| 3625-1-2 | Mata <i>pdr5::KanMX san1::TRP1 ubr1::Sphis5<sup>+</sup> RPN11-3×FLAG::HIS3 P<sub>GAL</sub>Htt103QP-GFP::URA3</i>         | This study  |
| 3622-1-3 | Mata <i>pdr5::KanMX cdc48-3 san1::TRP1 ubr1::Sphis5<sup>+</sup> RPN11-3×FLAG::HIS3 P<sub>GAL</sub>Htt103QP-GFP::URA3</i> | This study  |
| 3624-1-1 | Mata <i>pdr5::Kan cdc48-3 san1::TRP1 ubr1::Sphis5<sup>+</sup> RPN11-3×FLAG::HIS3 P<sub>GAL</sub>Htt103QP-GFP::URA3</i>   | This study  |
| 3967-2-4 | Mata <i>pdr5::Kan cdc48-3 dsk2::TRP1 rad23::Sphis5<sup>+</sup> RPN11-3×FLAG::HIS3</i>                                    | This study  |
| YYW315-2 | Mata <i>HSP104-GFP::TRP1</i>                                                                                             | This study  |
| 3506-1-1 | Mata <i>cdc48-3 HSP104-GFP::TRP1</i>                                                                                     | This study  |
| YYW316-1 | Mata <i>HSP104-GFP::Sphis5<sup>+</sup></i>                                                                               | This study  |
| 3641-2-2 | Mata <i>npl4-1 HSP104-GFP::Sphis5<sup>+</sup></i>                                                                        | This study  |
| 3642-1-1 | Mata <i>ufd1-2 HSP104-GFP::Sphis5<sup>+</sup></i>                                                                        | This study  |
| YYW313-1 | Mata <i>P<sub>GAL</sub>Htt103Q-GFP::URA3</i>                                                                             | This study  |
| PHY648   | Mata <i>ppz1::KANMX ppz2::NATMX</i>                                                                                      | MacGurn lab |
| 4023-1-1 | Mata <i>cdc48-3 ppz1::KANMX</i>                                                                                          | This study  |
| 4023-2-4 | Mata <i>cdc48-3 ppz1::KANMX ppz2::NATMX</i>                                                                              | This study  |
| 4023-8-4 | Mata <i>cdc48-3 ppz1::KANMX ppz2::NATMX</i>                                                                              | This study  |
